# Supplementary material for: Hazard assessment modeling and software development of earthquake-triggered landslides in the Sichuan–Yunnan area, China
Source: Copernicus journal article supplement (doi:10.5194/gmd-16-5113-2023), 2023-09-06
Supplement: Supplementary file 1 [file gmd-16-5113-2023-supplement.pdf]

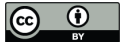

*Supplement of*

## **Hazard assessment modeling and software development of earthquake-triggered landslides in the Sichuan–Yunnan area, China**

**Xiaoyi Shao et al.**

*Correspondence to:* Chong Xu (xc11111111@126.com)

The copyright of individual parts of the supplement might differ from the article licence.

## Supplementary materials

### 1. Description of Xu<sub>2019</sub> model

In this study, the bayesian probability method and the logistic regression (LR) model are used to establish a new generation of earthquake-triggered landslide hazard model in China (Xu<sub>2019</sub> model) ([Xu et al., 2019](#)). The Xu<sub>2019</sub> model is produced on the basis of nine earthquake cases, including the 1999 Mw 7.6 Chi-chi earthquake, the 2005 Mw 7.6 Kashmir earthquake, the 2008 Mw7.9 Wenchuan earthquake , the 2010 Mw 6.9 Yushu earthquake , the 2013 Mw 6.6 Lushan earthquake, the 2013 Mw 5.9 Minxian earthquake, the 2014 Mw 6.6 Ludian earthquake, the 2015 Mw7.8 Gorkha Nepal earthquake, and the 2017 Mw 6.5 Jiuzhaigou earthquake. Seven of the nine earthquakes occurred in China. The 2005 Kashmir and the 2015 Nepal seismic events occurred in China's neighboring areas, which can better control the accuracy of the model ([Xu et al., 2019](#)). All these earthquake events have detailed and complete coseismic landslide inventories. All landslide inventories include 306435 landslide polygons. Considering the real earthquake landslide occurrence area, the difference of landslide size and the ratio of sliding to non-sliding sample ratio, a total of 5117000 samples are selected. A total of 13 influencing factors are selected for model building which are elevation, topographic relief, hillslope gradient, slope aspect, curvature, slope position, topographic wetness index, land-cover type, vegetation coverage percentage, distance to fault, lithology, average annual precipitation, and seismic intensity. The Bayesian probability method is combined with the LR model to establish a near-real-time model for the probability of earthquake-triggered landslide ([Shao et al., 2020](#); [Shao et al., 2021](#)). The weights of each continuous factor and the weight of each class of the classification factor are obtained based on the SPSS software. The model can be applied in near-real-time hazard assessment of earthquake-induced landslides considering the seismic intensity as the triggering factors of landslides.

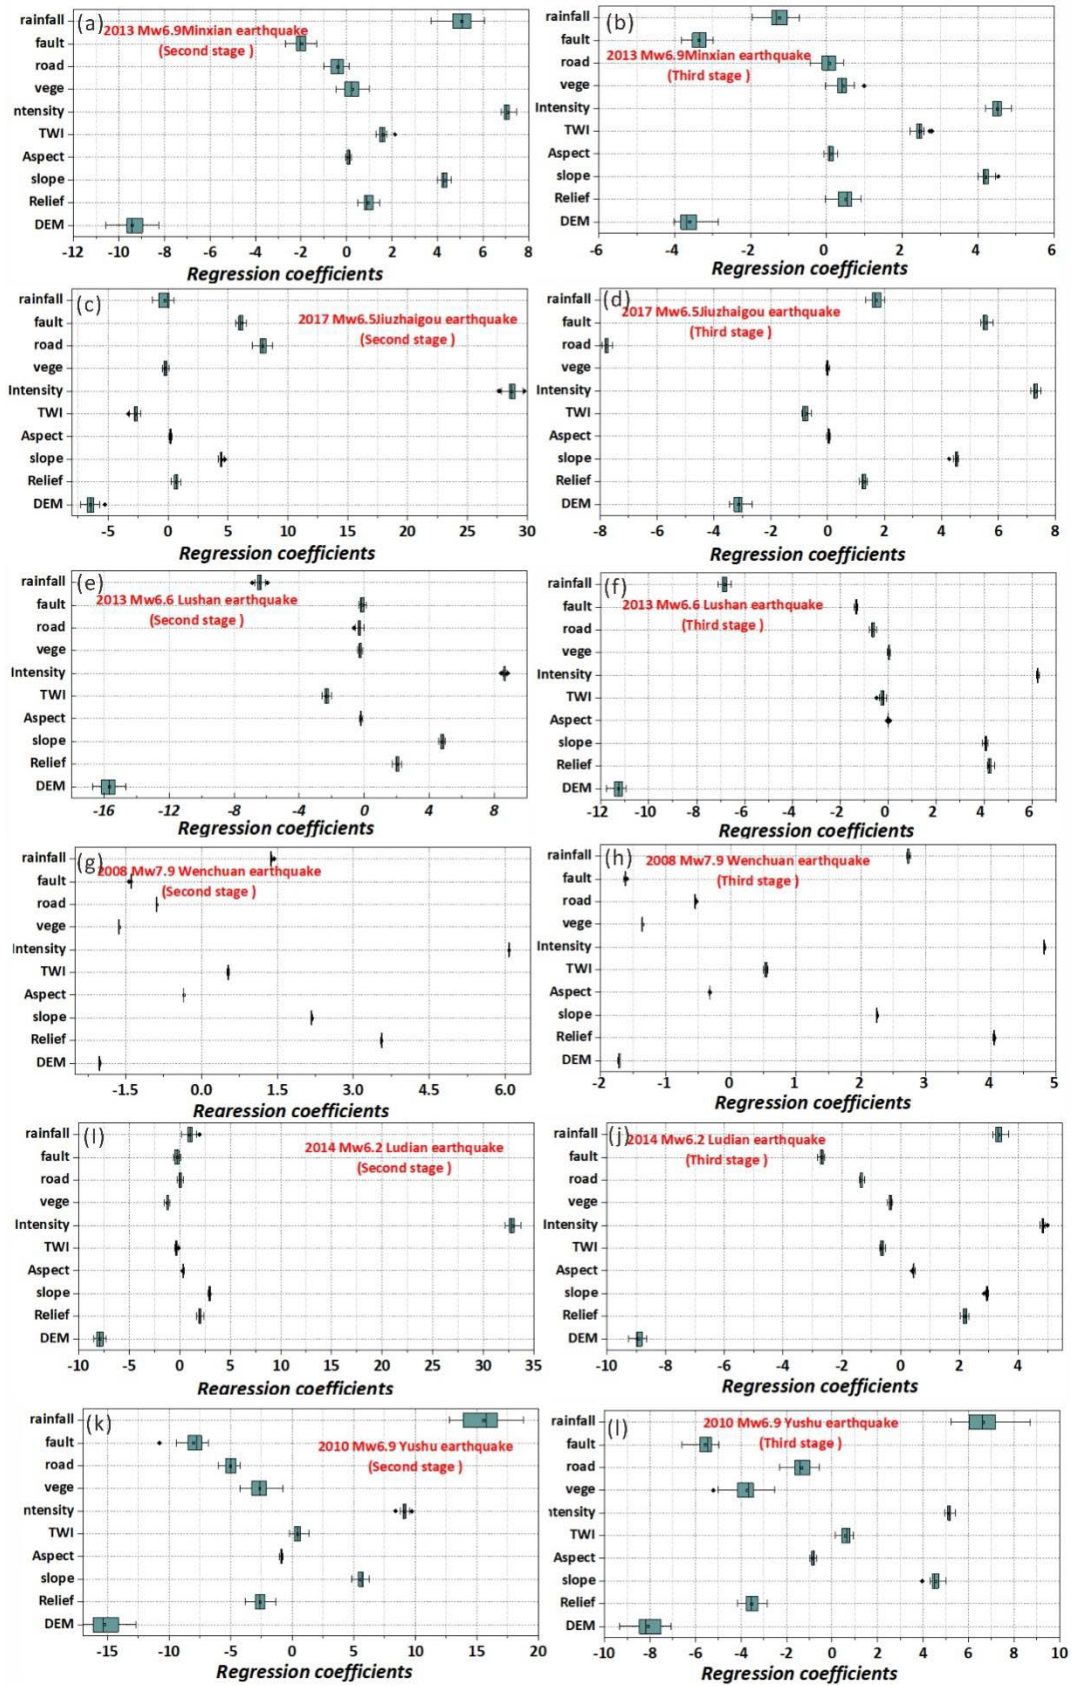

Fig.S1 LR regression coefficients of continuous independent variables of six earthquake events in different stages

Table S1 Predicted landslide area for six earthquake events in different evaluation stages

|                         |       | 2013 Minxian earthquake |         |         | 2014 Ludian earthquake |         |         | 2017 Jiuzhaigou earthquake |         |         | 2013 Lushan earthquake |         |         | 2010 Yushu earthquake |         |         | 2008 Wenchuan earthquake |         |         |
|-------------------------|-------|-------------------------|---------|---------|------------------------|---------|---------|----------------------------|---------|---------|------------------------|---------|---------|-----------------------|---------|---------|--------------------------|---------|---------|
|                         |       | Stage 1                 | Stage 2 | Stage 3 | Stage 1                | Stage 2 | Stage 3 | Stage 1                    | Stage 2 | Stage 3 | Stage 1                | Stage 2 | Stage 3 | Stage 1               | Stage 2 | Stage 3 | Stage 1                  | Stage 2 | Stage 3 |
| Area (km <sup>2</sup> ) | Mean  | 1.85                    | 1.8     | 2.2     | 4.2                    | 7       | 14.9    | 8.8                        | 3.3     | 12.8    | 30.1                   | 6.4     | 18.8    | 2.2                   | 0.8     | 1.2     | 1788.3                   | 1045.8  | 1158.7  |
|                         | (Std) |                         | (0.04)  | (0.04)  |                        | (0.07)  | (0.1)   |                            | (0.05)  | (0.11)  |                        | (0.07)  | (0.13)  |                       | (0.03)  | (0.03)  |                          | (0.84)  | (0.8)   |

Table S2 AUC Results of models validated by the six earthquake inventories in different evaluation stages

|           |      | 2013 Minxian earthquake |         |         | 2014 Ludian earthquake |         |         | 2017 Jiuzhaigou earthquake |         |         | 2013 Lushan earthquake |         |         | 2010 Yushu earthquake |         |         | 2008 Wenchuan earthquake |         |         |
|-----------|------|-------------------------|---------|---------|------------------------|---------|---------|----------------------------|---------|---------|------------------------|---------|---------|-----------------------|---------|---------|--------------------------|---------|---------|
|           |      | Stage 1                 | Stage 2 | Stage 3 | Stage 1                | Stage 2 | Stage 3 | Stage 1                    | Stage 2 | Stage 3 | Stage 1                | Stage 2 | Stage 3 | Stage 1               | Stage 2 | Stage 3 | Stage 1                  | Stage 2 | Stage 3 |
| AUC value | Mean | 0.57                    | 0.92    | 0.94    | 0.89                   | 0.87    | 0.95    | 0.84                       | 0.95    | 0.97    | 0.78                   | 0.84    | 0.93    | 0.83                  | 0.94    | 0.95    | 0.95                     | 0.95    | 0.95    |
|           | Std  | /                       | 0.001   | 0.001   | /                      | 0.005   | 0.001   | /                          | 0.003   | 0.003   | /                      | 0.001   | 0.001   | /                     | 0.001   | 0.001   | /                        | 0.001   | 0.001   |

Table S3 Results of models validated by the six earthquake inventories

|    | 2017 Jiuzhaigou earthquake |         |         | 2014 Ludian earthquake |         |         | 2013 Lushan earthquake |         |         | 2008 Wenchuan earthquake |         |         | 2013 Minxian earthquake |         |         | 2010 Yushu earthquake |         |         |
|----|----------------------------|---------|---------|------------------------|---------|---------|------------------------|---------|---------|--------------------------|---------|---------|-------------------------|---------|---------|-----------------------|---------|---------|
|    | Stage 1                    | Stage 2 | Stage 3 | Stage 1                | Stage 2 | Stage 3 | Stage 1                | Stage 2 | Stage 3 | Stage 1                  | Stage 2 | Stage 3 | Stage 1                 | Stage 2 | Stage 3 | Stage 1               | Stage 2 | Stage 3 |
|    | TN                         | 24.9    | 47.6    | 41.9                   | 28.2    | 46.7    | 34.5                   | 28.1    | 47.6    | 41.2                     | 28.2    | 31.3    | 23.2                    | 45.9    | 46.2    | 45.4                  | 45.3    | 48.6    |
| TP | 48.1                       | 30.2    | 49.0    | 48.1                   | 29.9    | 49.3    | 41.9                   | 17.2    | 43.8    | 49.2                     | 49.2    | 49.7    | 8.2                     | 40.1    | 42.6    | 25.4                  | 25.7    | 37.5    |
| FN | 25.0                       | 2.3     | 8.0     | 21.7                   | 3.2     | 15.4    | 21.8                   | 2.3     | 8.7     | 21.7                     | 18.6    | 26.7    | 4.0                     | 3.7     | 4.5     | 4.6                   | 1.3     | 2.6     |
| FP | 1.8                        | 19.7    | 0.9     | 1.8                    | 20.0    | 0.6     | 8.0                    | 32.7    | 6.1     | 0.7                      | 0.7     | 0.2     | 41.7                    | 9.8     | 7.3     | 24.5                  | 24.2    | 12.4    |

Shao, X., Ma, S., Xu, C., and Zhou, Q.: Effects of sampling intensity and non-slide/slide sample ratio on the occurrence probability of coseismic landslides, *Geomorphology*, 363, 107222, <https://doi.org/10.1016/j.geomorph.2020.107222>, 2020.

Shao, X., Xu, C., Ma, S., Shyu, J., and Zhou, Q.: Calculation of landslide occurrence probability in Taiwan region under different ground motion conditions, *J. Mt. Sci.*, 18, 1003-1012, <https://doi.org/10.1007/s11629-020-6540-2>, 2021.

Xu, C., Xu, X., Zhou, B., and Shen, L.: Probability of coseismic landslides: A new generation of earthquake-triggered landslide hazard model, *Journal of Engineering Geology*, 27, 1122, <https://doi.org/10.13544/j.cnki.jeg.2019084>, 2019 (in Chinese).
